# Supplementary material for: Genome analysis of myelodysplastic syndromes among atomic bomb survivors in Nagasaki
Source: PubMed Central journal article supplement — Haematologica. 2019 May 17;105(2):358–65. doi: 10.3324/haematol.2019.219386 (PMC7012461; doi:10.3324/haematol.2019.219386), 2020-02
Supplement: 2019_219386-Disclosures_and_Contributions.pdf [file 2019_219386-Disclosures_and_Contributions.pdf]

Haematologica  
HAEMATOL/2019/219386  
Version 3

Genome analysis of myelodysplastic syndromes among atomic bomb survivors in Nagasaki

Masataka Taguchi, Hiroyuki Mishima, Yusuke Shiozawa, Chisa Hayashida, Akira Kinoshita, Yasuhito Nannya, Hideki Makishima, Makiko Horai, Masatoshi Matsuo, Shinya Sato, Hidehiro Itonaga, Takeharu Kato, Hiroaki Taniguchi, Daisuke Imanishi, Yoshitaka Imaizumi, Tomoko Hata, Motoi Takenaka, Yuki Yoshi Moriuchi, Yuichi Shiraishi, Satoru Miyano, Seishi Ogawa, Koh-ichiro Yoshiura, and Yasushi Miyazaki

Disclosures: none

Contributions: K-I.Y. and Y. Miyazaki planned and managed the project; M. Taguchi, K-I.Y., S.O., and Y. Miyazaki designed experiments, analyzed the data, and wrote the manuscript; M. Taguchi, H.M., Y.S., C.H., Y.N., H.M., and M. Takenaka performed the research and analyzed the data; M.H., M.M., S.S., H.I., T.K., H.T., and Y. Moriuchi collected patient samples and clinical data; A.K., D.I., Y.I., and T.H. supervised the experiments. All authors read and approved the final version of the manuscript.
